# Supplementary material for: Bioactive Diphenyl Ethers and Isocoumarin Derivatives from a Gorgonian-Derived Fungus Phoma sp. (TA07-1)
Source: PubMed Central journal article supplement (PMC5484096; doi:10.3390/md15060146), 2017-05-25
Supplement: marinedrugs-15-00146-s001.pdf [file marinedrugs-15-00146-s001.pdf]

---

## Supplementary Materials: Bioactive Diphenyl Ether Derivatives and Isocoumarin Derivatives from Gorgonian-Derived Fungus *Phoma* sp.

Ting Shi, Jun Qi, Chang-lun Shao, Dong-lin Zhao, Xue-mei Hou and Chang-yun Wang\*

**Figure S1.**  $^1\text{H}$  NMR spectrum of compound **1** (DMSO- $d_6$ ).

**Figure S2.**  $^{13}\text{C}$  NMR spectrum of compound **1** (DMSO- $d_6$ ).

**Figure S3.** COSY spectrum of compound **1** (DMSO- $d_6$ ).

**Figure S4.** HMQC spectrum of compound **1** (DMSO- $d_6$ ).

**Figure S5.** HMBC spectrum of compound **1** (DMSO- $d_6$ ).

**Figure S6.** ESIMS spectrum of compound **1**.

**Figure S7.** HRESIMS spectrum of compound **1**.

**Figure S8.**  $^1\text{H}$  NMR spectrum of compound **2** (CD<sub>3</sub>OD).

**Figure S9.**  $^{13}\text{C}$  NMR spectrum of compound **2** (CD<sub>3</sub>OD).

**Figure S10.** COSY spectrum of compound **2** (CD<sub>3</sub>OD).

**Figure S11.** HMQC spectrum of compound **2** (CD<sub>3</sub>OD).

**Figure S12.** HMBC spectrum of compound **2** (CD<sub>3</sub>OD).

**Figure S13.** ESIMS spectrum of compound **2**.

**Figure S14.** HRESIMS spectrum of compound **2**.

**Figure S15.**  $^1\text{H}$  NMR spectrum of compound **3** (CD<sub>3</sub>OD).

**Figure S16.**  $^{13}\text{C}$  NMR spectrum of compound **3** (CD<sub>3</sub>OD).

**Figure S17.** COSY spectrum of compound **3** (CD<sub>3</sub>OD).

**Figure S18.** HMQC spectrum of compound **3** (CD<sub>3</sub>OD).

**Figure S19.** HMBC spectrum of compound **3** (CD<sub>3</sub>OD).

**Figure S20.** ESIMS spectrum of compound **3**.

**Figure S21.** HRESIMS spectrum of compound **3**.

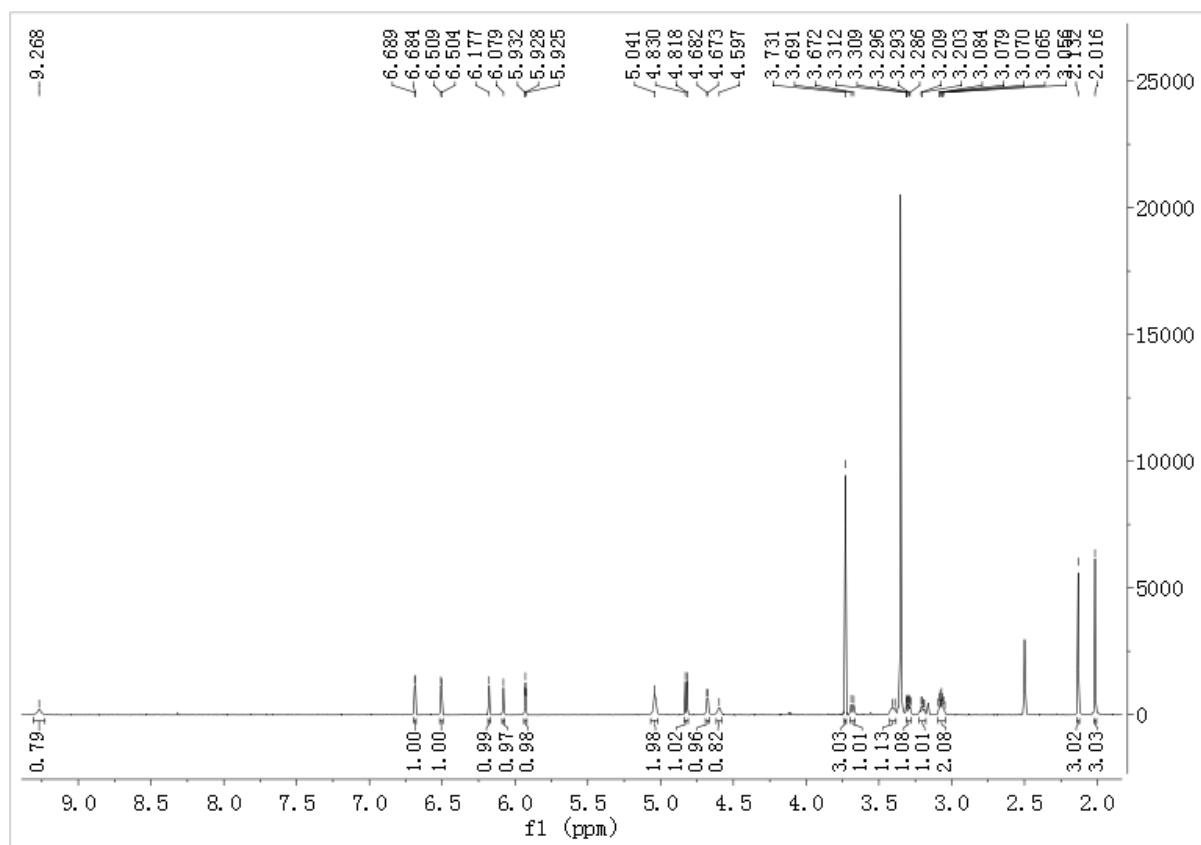

**Figure S1.**  $^1\text{H}$  NMR spectrum of compound 1 (DMSO- $d_6$ ).

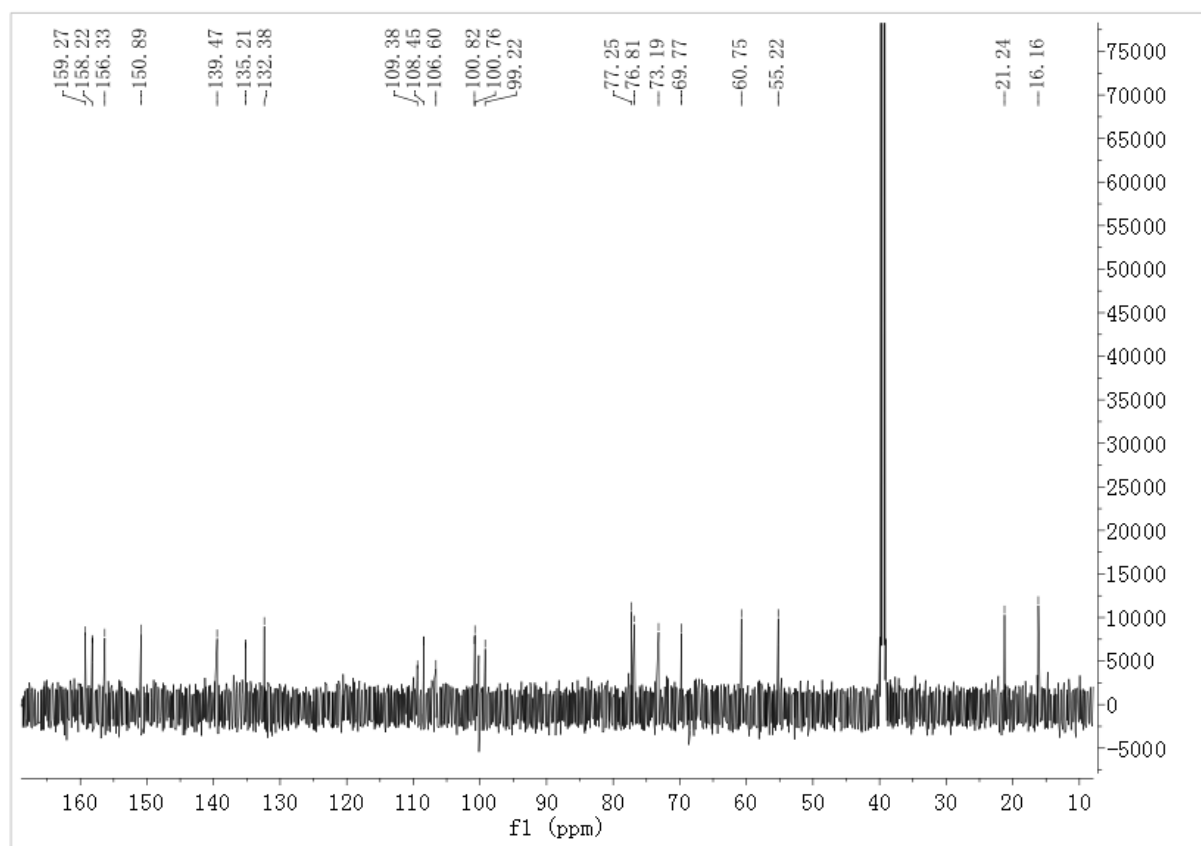

**Figure S2.**  $^{13}\text{C}$  NMR spectrum of compound 1 (DMSO- $d_6$ ).

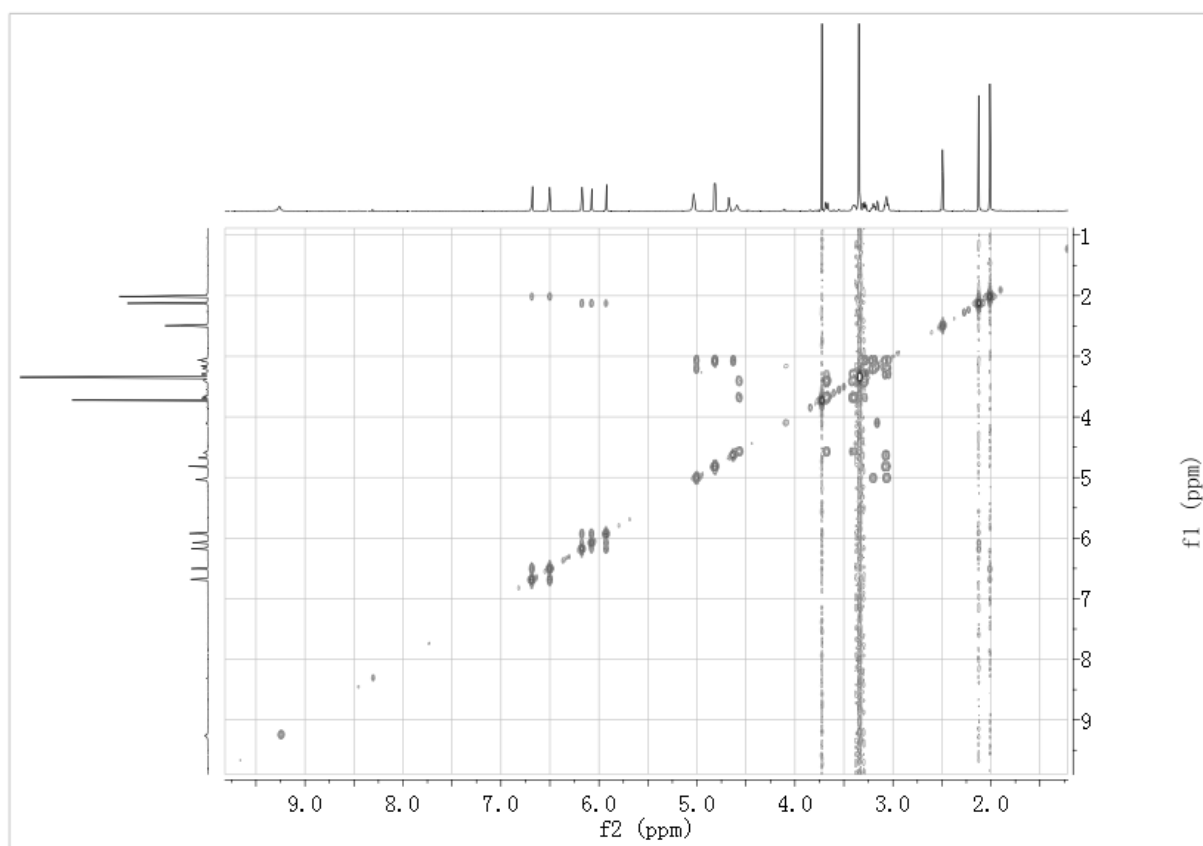

**Figure S3.** COSY spectrum of compound 1 (DMSO-*d*<sub>6</sub>).

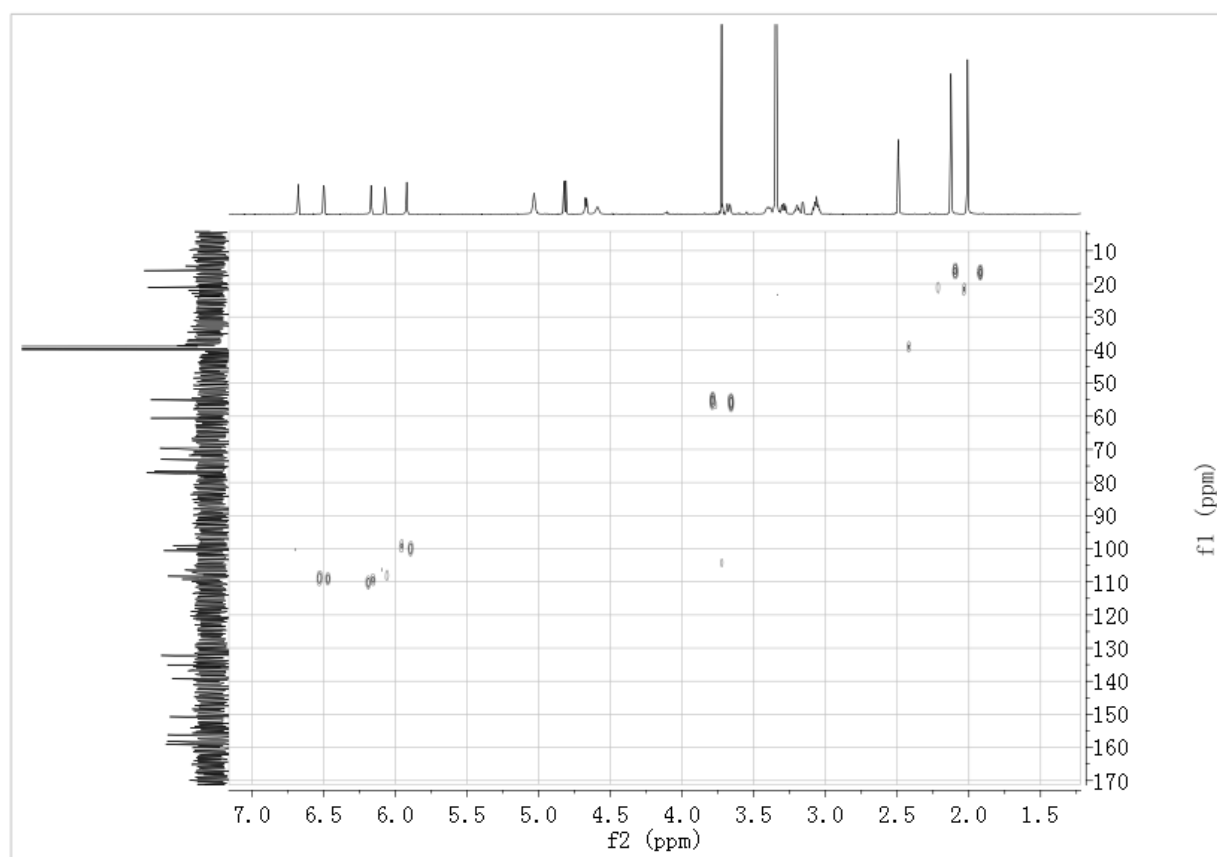

**Figure S4.** HMQC spectrum of compound 1 (DMSO-*d*<sub>6</sub>).

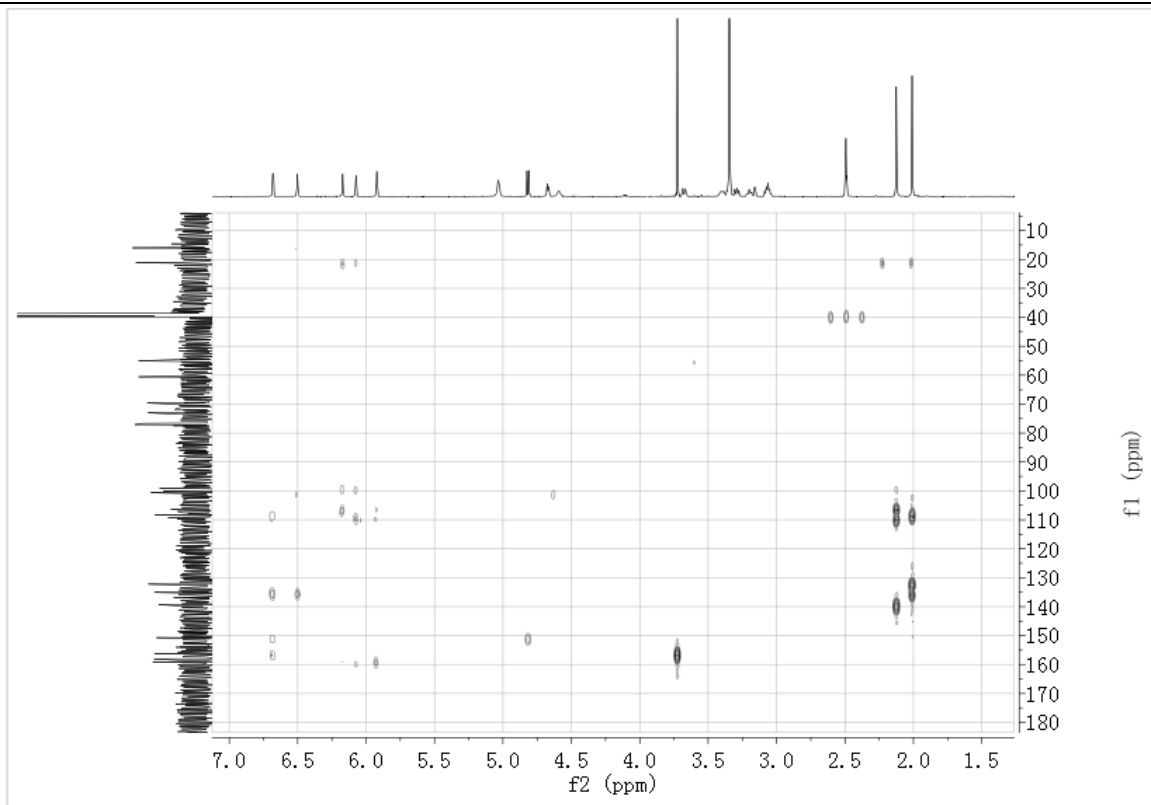

Figure S5. HMBC spectrum of compound 1 (DMSO-*d*<sub>6</sub>).

Display Report

|                      |                                         |                  |                      |
|----------------------|-----------------------------------------|------------------|----------------------|
| <b>Analysis Info</b> |                                         | Acquisition Date | 4/10/2012 9:07:25 AM |
| Analysis Name        | D:\Data\ZHENGJUANJUAN\20120410\LH424D.d | Operator         | OUC                  |
| Method               | 20120331-zz2-NEIBIAO-lcms.m             | Instrument       | amaZon SL            |
| Sample Name          | LH424D                                  |                  |                      |
| Comment              |                                         |                  |                      |

|                              |                     |              |           |                          |          |
|------------------------------|---------------------|--------------|-----------|--------------------------|----------|
| <b>Acquisition Parameter</b> |                     |              |           |                          |          |
| Ion Source Type              | ESI                 | Ion Polarity | Positive  | Alternating Ion Polarity | off      |
| Mass Range Mode              | Enhanced Resolution | Scan Begin   | 200 m/z   | Scan End                 | 1000 m/z |
| Capillary Exit               | 140.0 V             | n/a          | n/a       | Trap Drive               | 56.6     |
| Accumulation Time            | 75 µs               | Averages     | 3 Spectra | Auto MS/MS               | off      |

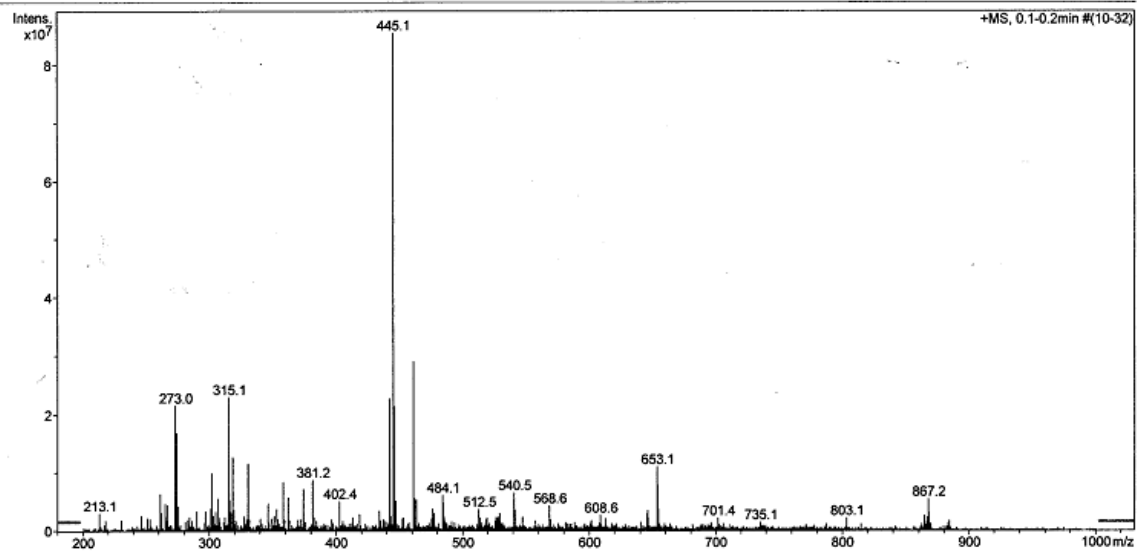

Figure S6. ESIMS spectrum of compound 1.

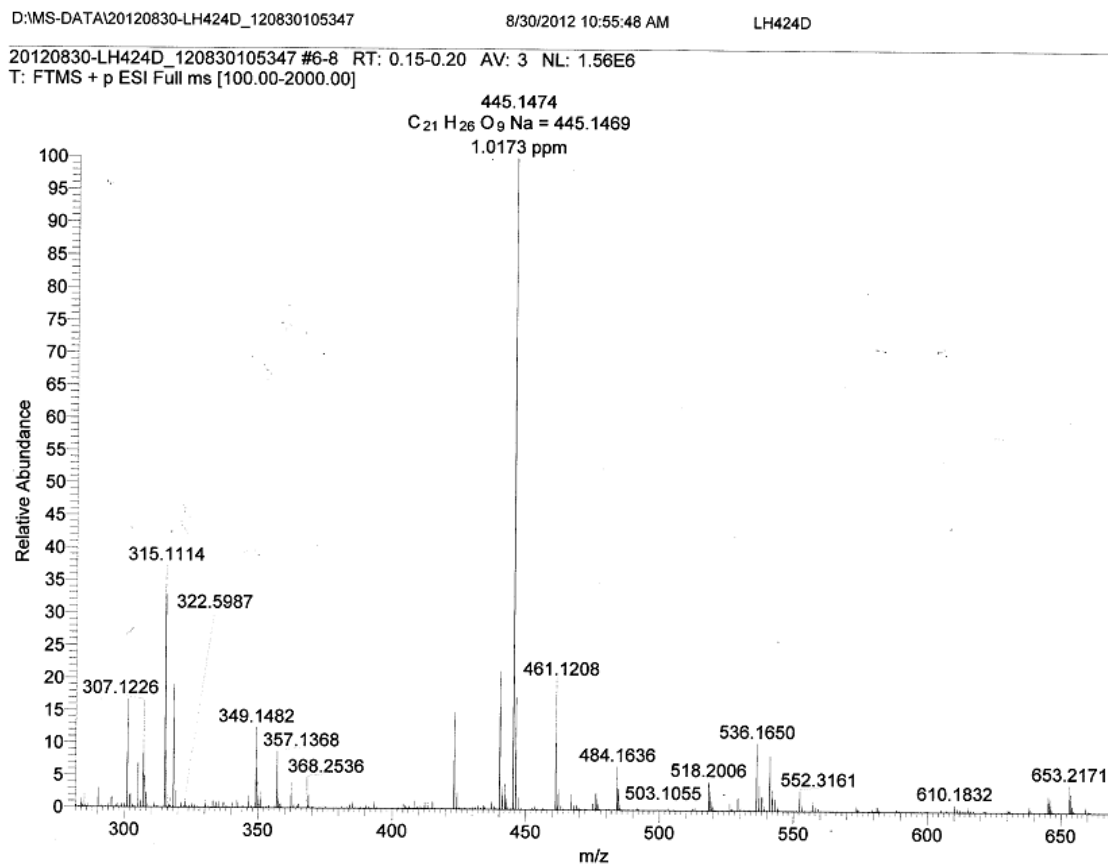

Figure S7. HRESIMS spectrum of compound 1.

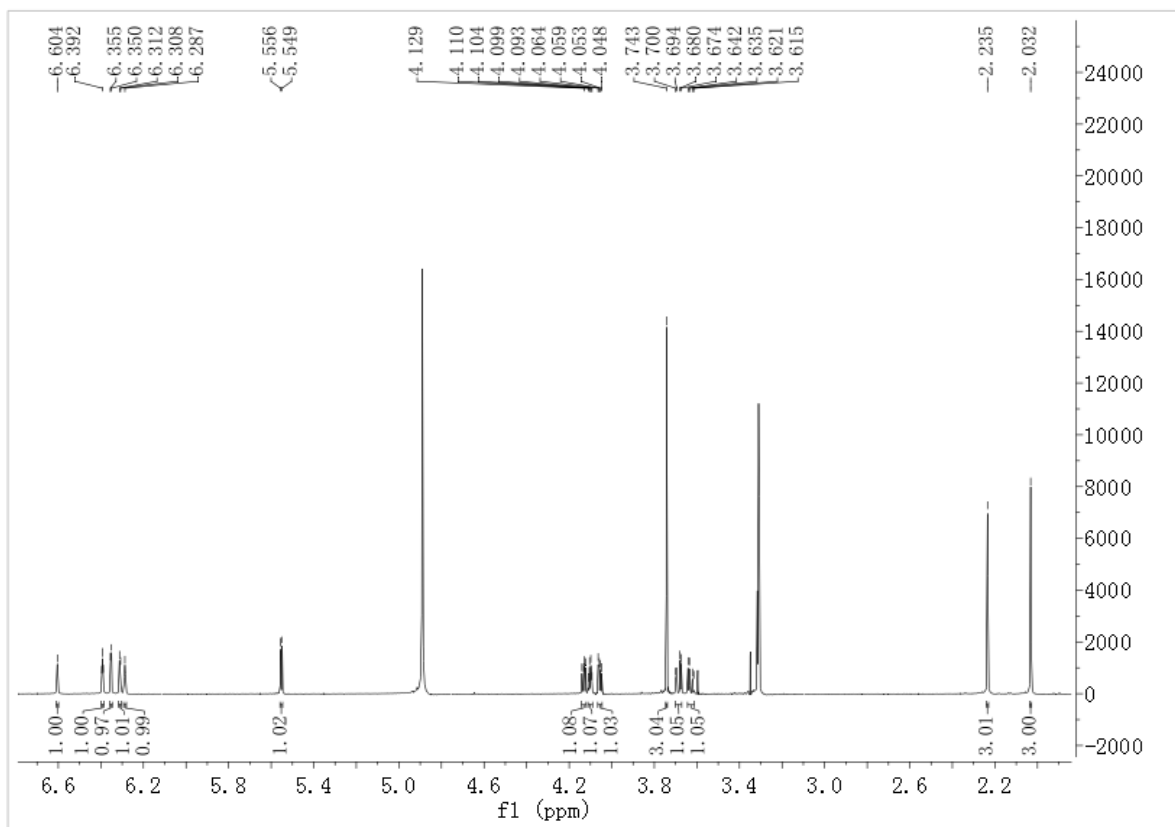Figure S8.  $^1H$  NMR spectrum of compound 2 ( $CD_3OD$ ).

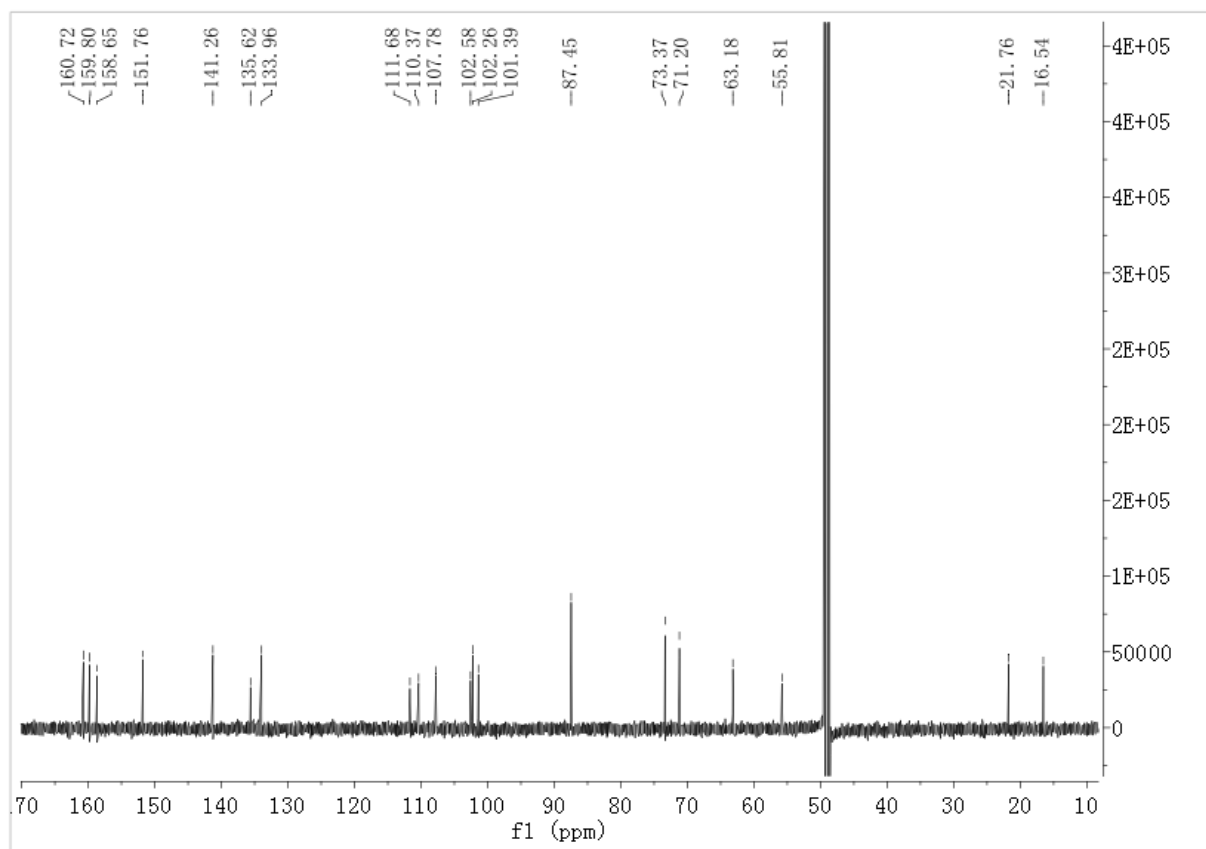

**Figure S9.**  $^{13}\text{C}$  NMR spectrum of compound **2** ( $\text{CD}_3\text{OD}$ ).

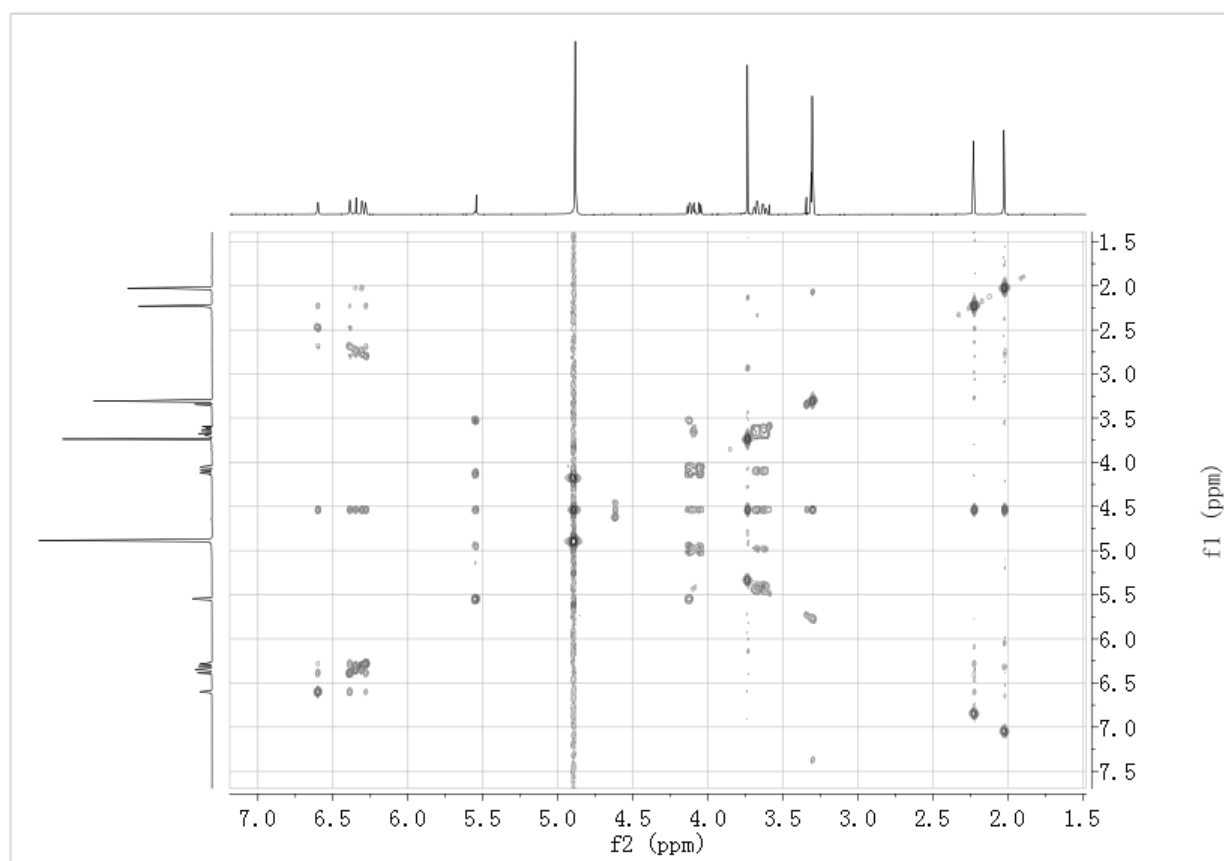

**Figure S10.** COSY spectrum of compound **2** ( $\text{CD}_3\text{OD}$ ).

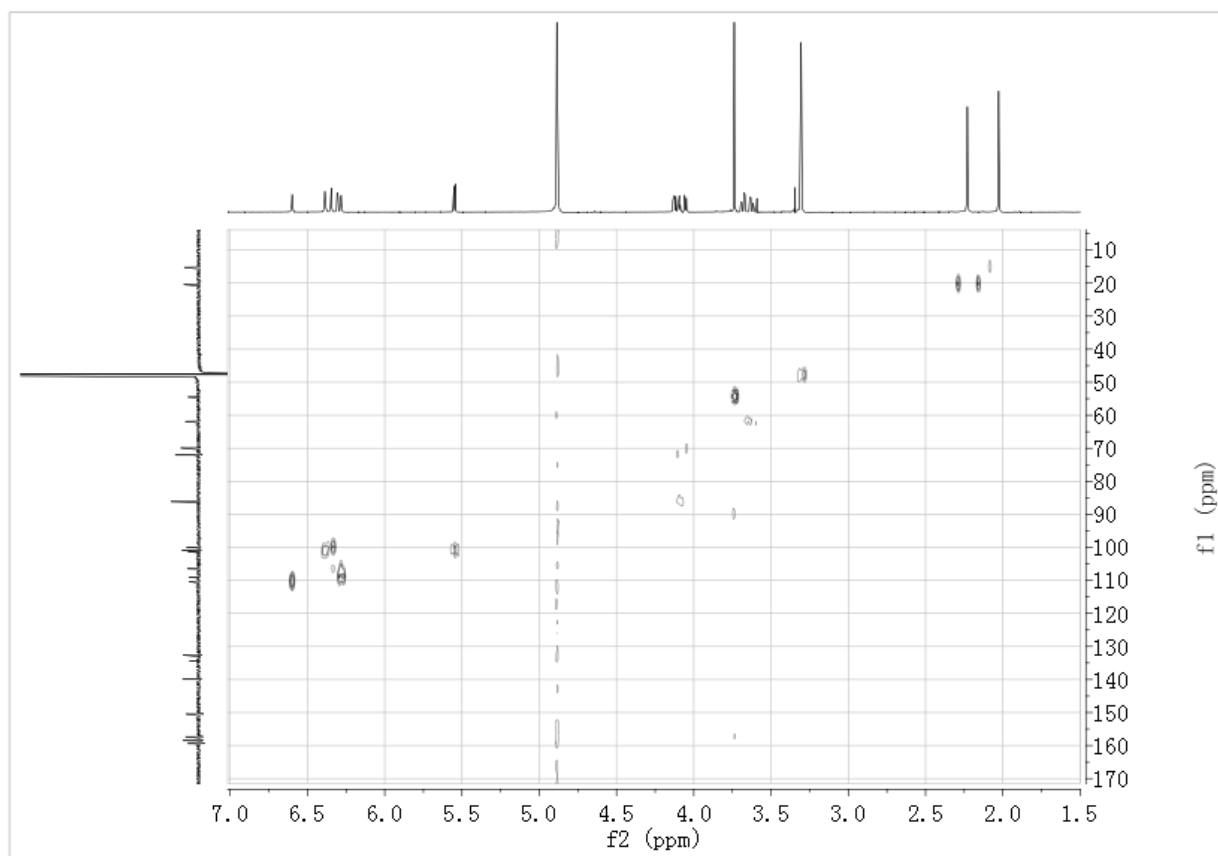

**Figure S11.** HMQC spectrum of compound **2** (CD<sub>3</sub>OD).

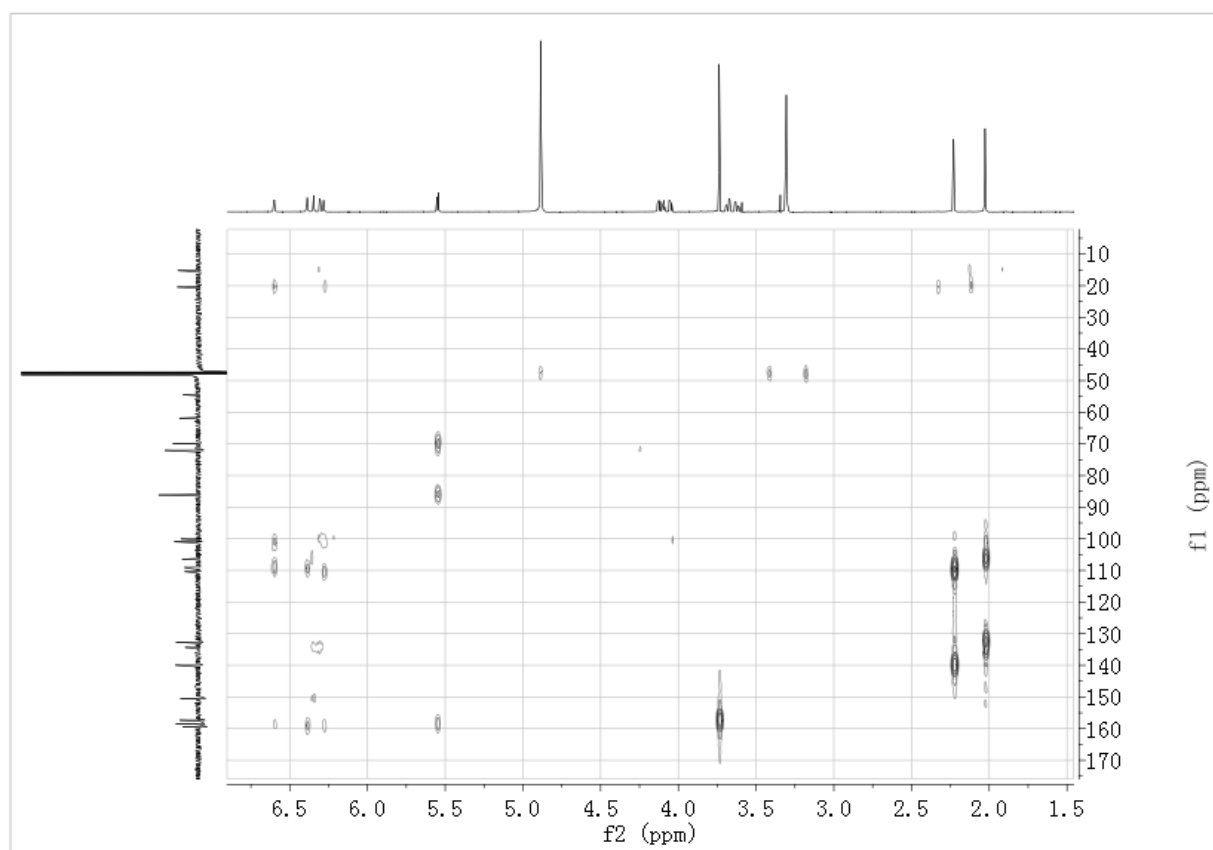

**Figure S12.** HMBC spectrum of compound **2** (CD<sub>3</sub>OD).

Display Report

|                              |                                        |                  |                      |                          |          |
|------------------------------|----------------------------------------|------------------|----------------------|--------------------------|----------|
| <b>Analysis Info</b>         |                                        | Acquisition Date | 4/10/2012 9:16:58 AM |                          |          |
| Analysis Name                | D:\Data\ZHENGJUANJUAN\20120410\LH246.d |                  | Operator             | OUC                      |          |
| Method                       | 20120331-zz2-NEIBIAO-lcms.m            |                  | Instrument           | amaZon SL                |          |
| Sample Name                  | LH246                                  |                  |                      |                          |          |
| Comment                      |                                        |                  |                      |                          |          |
| <b>Acquisition Parameter</b> |                                        |                  |                      |                          |          |
| Ion Source Type              | ESI                                    | Ion Polarity     | Positive             | Alternating Ion Polarity | off      |
| Mass Range Mode              | Enhanced Resolution                    | Scan Begin       | 200 m/z              | Scan End                 | 1000 m/z |
| Capillary Exit               | 140.0 V                                | n/a              | n/a                  | Trap Drive               | 56.6     |
| Accumulation Time            | 29 $\mu$ s                             | Averages         | 3 Spectra            | Auto MS/MS               | off      |

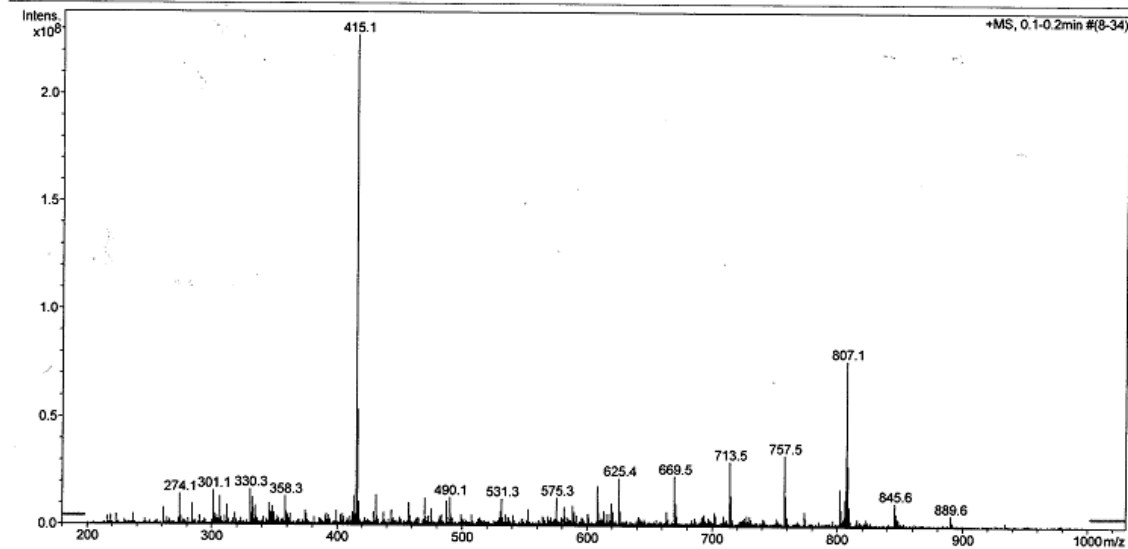

Bruker Compass DataAnalysis 4.0

printed: 4/10/2012 10:17:08 AM

Page 1 of 1

Figure S13. ESIMS spectrum of compound 2.

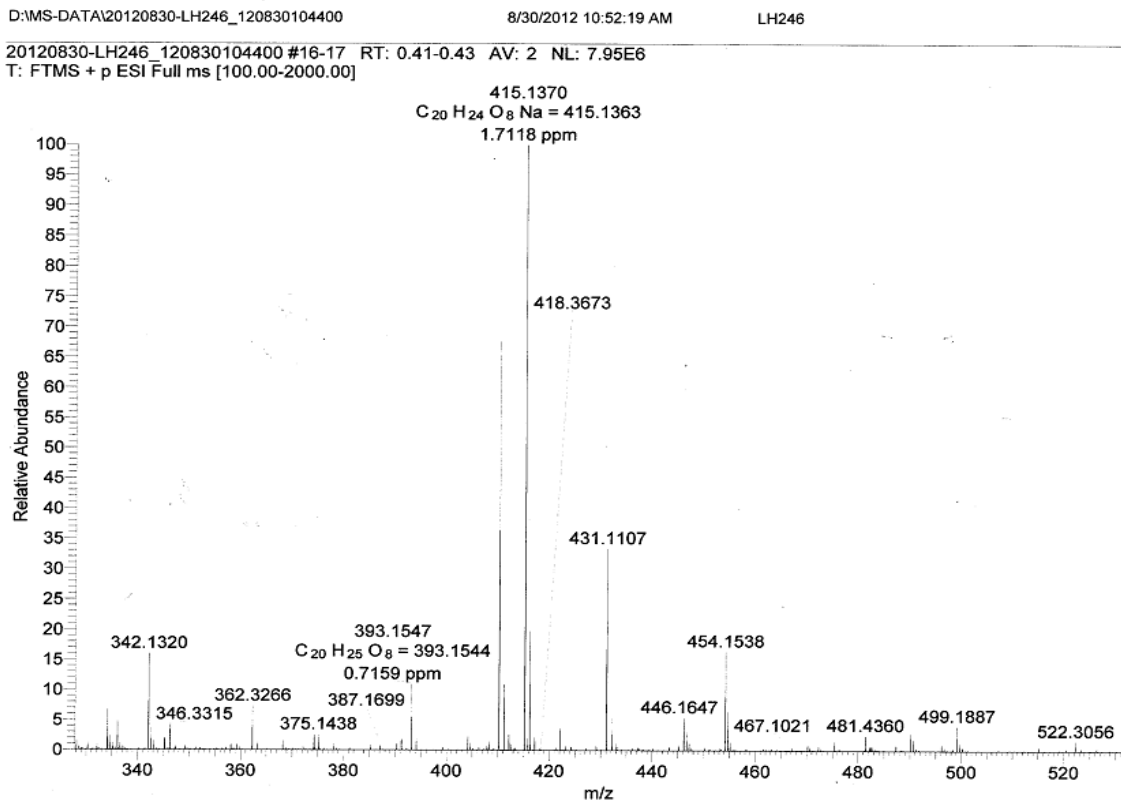

Figure S14. HRESIMS spectrum of compound 2.



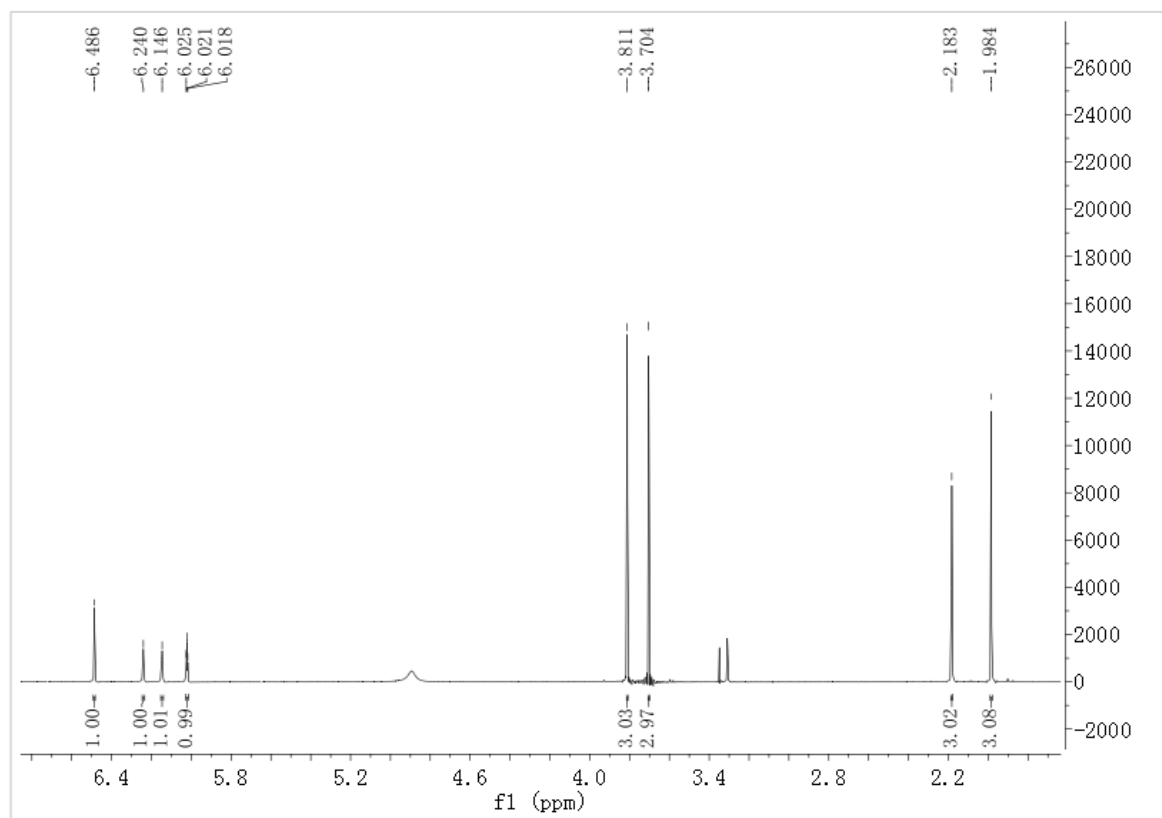

Figure S15.  $^1\text{H}$  NMR spectrum of compound 3 ( $\text{CD}_3\text{OD}$ ).

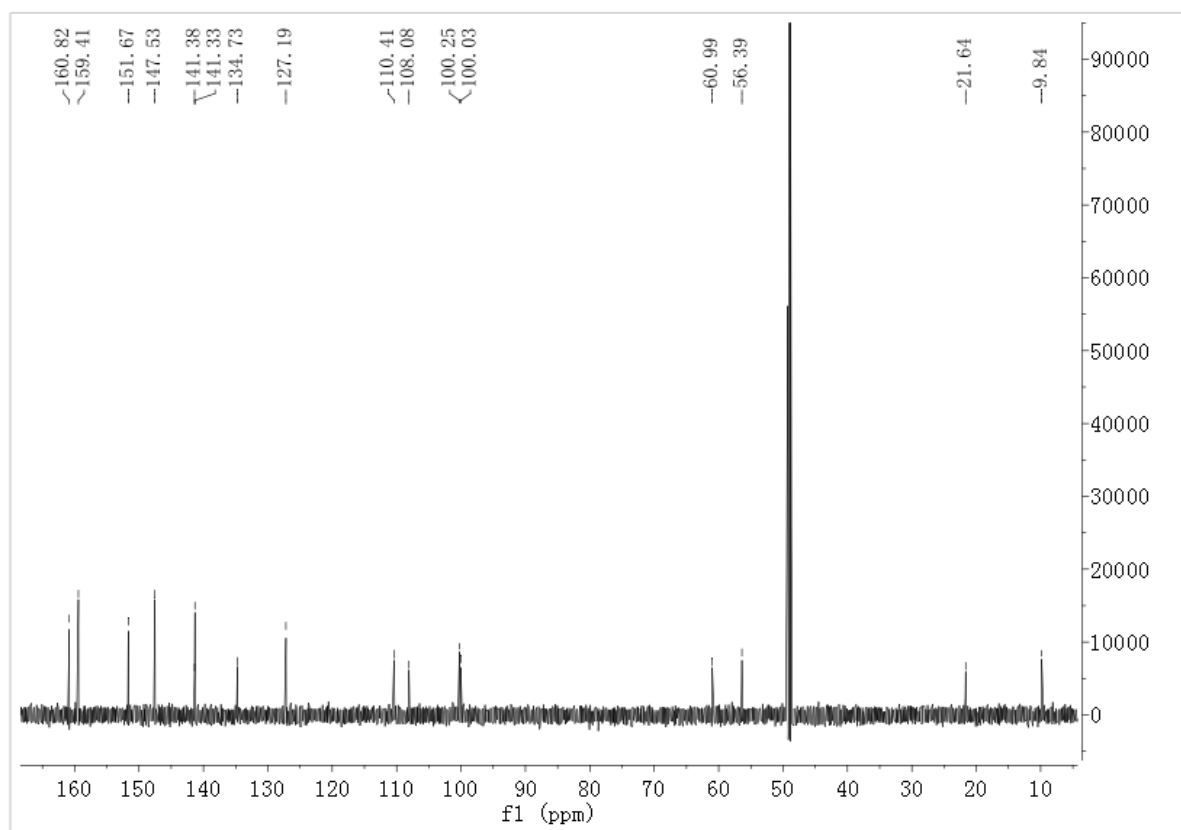

Figure S16.  $^{13}\text{C}$  NMR spectrum of compound 3 ( $\text{CD}_3\text{OD}$ ).

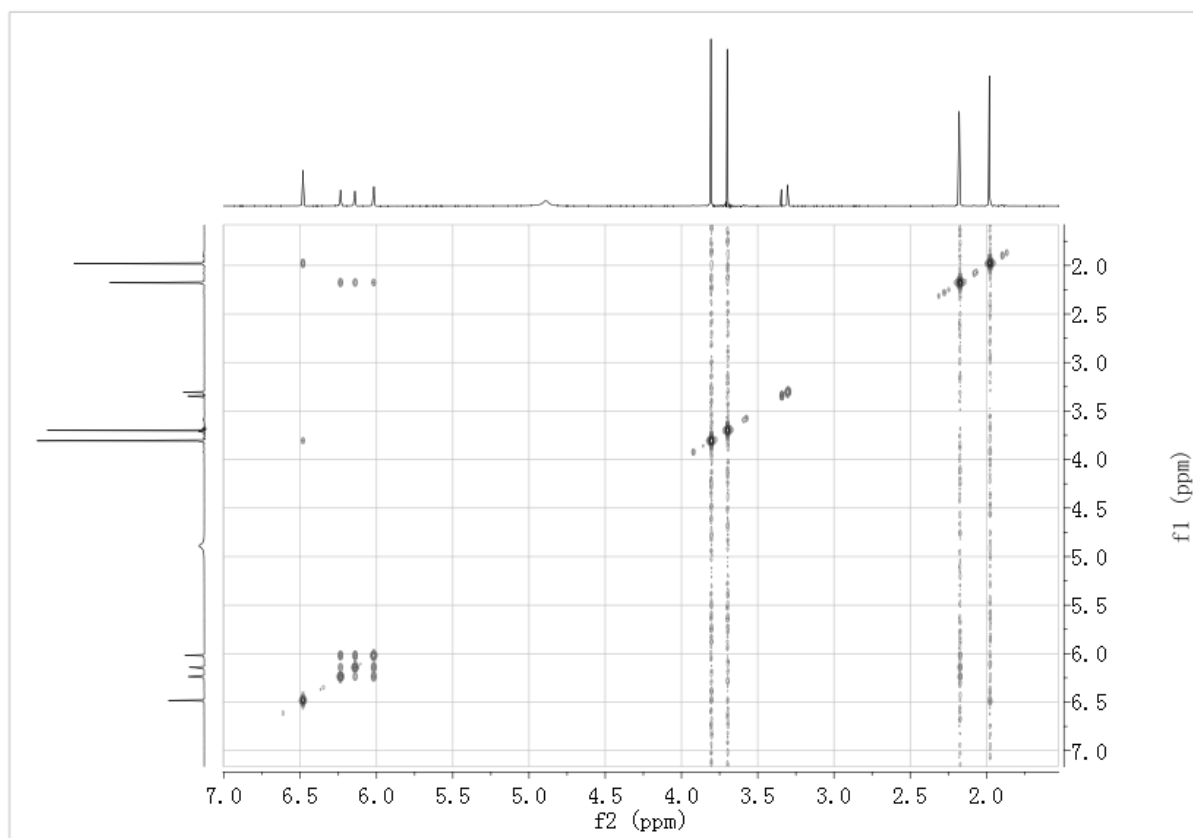

**Figure S17.** COSY spectrum of compound **3** (CD<sub>3</sub>OD).

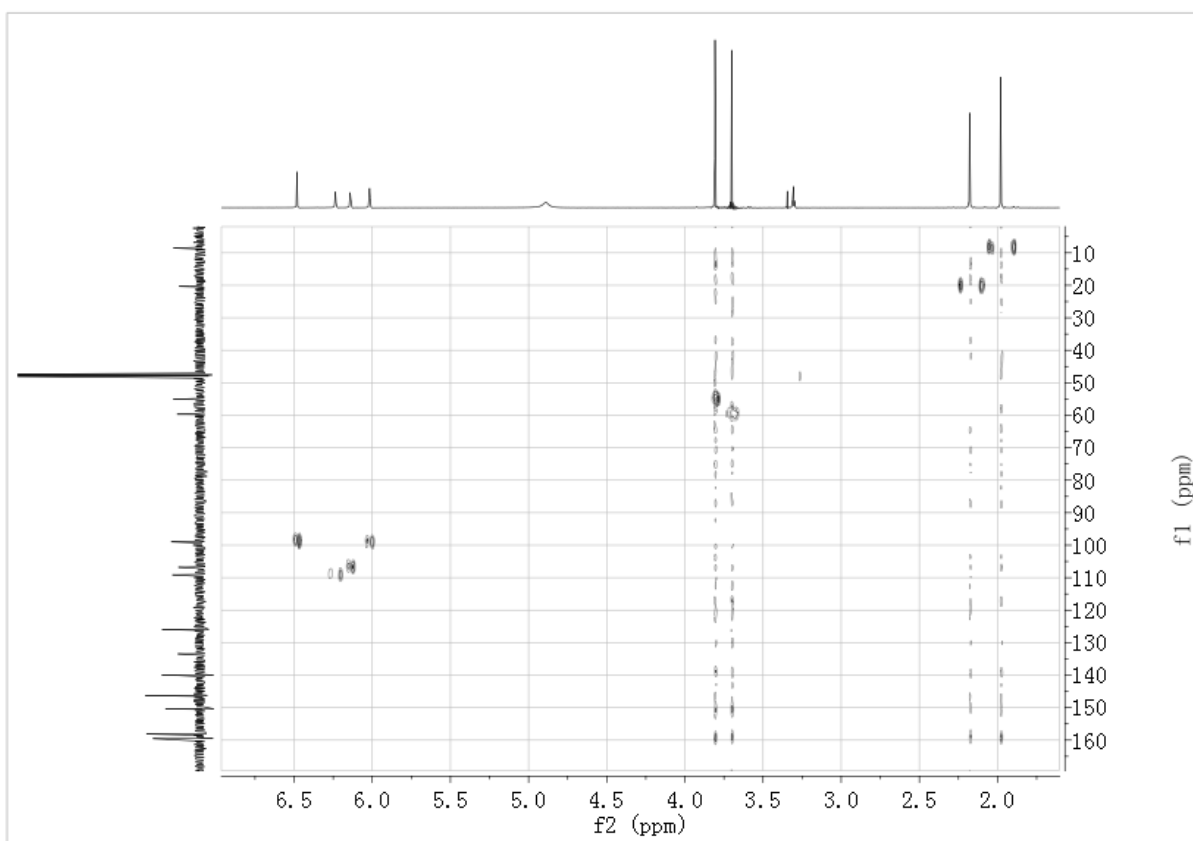

**Figure S18.** HMBC spectrum of compound **3** (CD<sub>3</sub>OD).

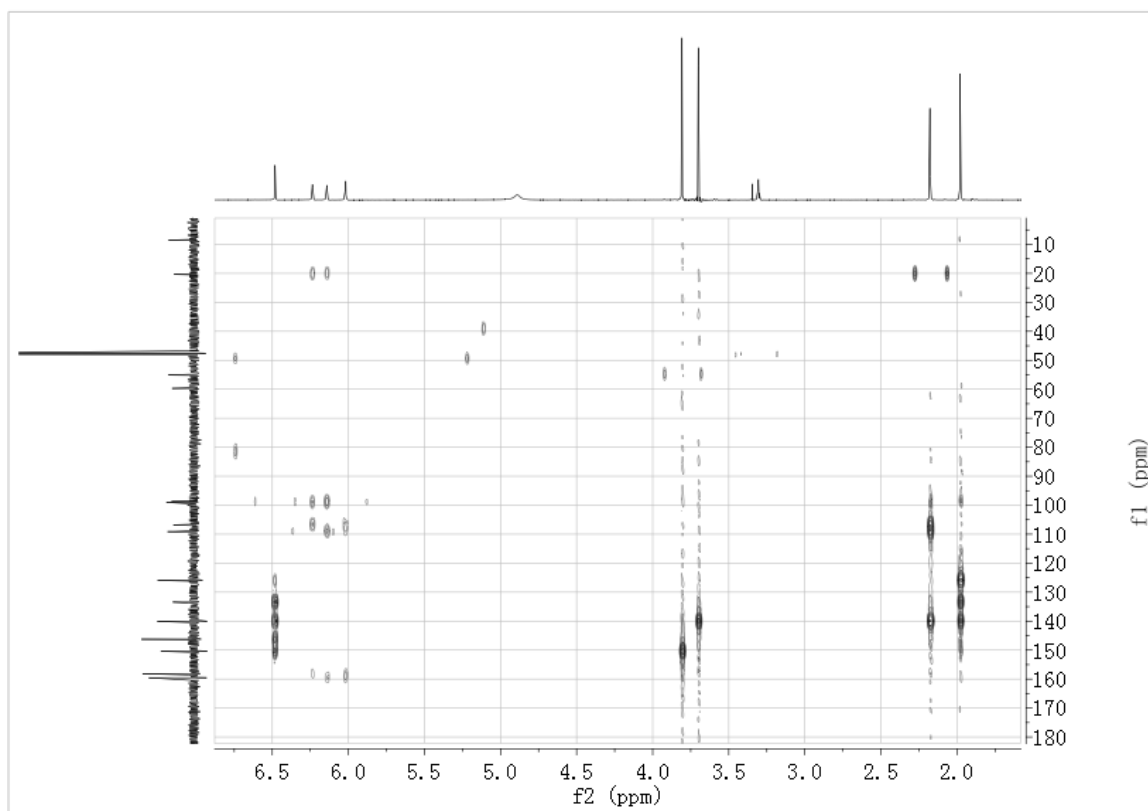

Figure S19. HMBC spectrum of compound 3 (CD<sub>3</sub>OD).

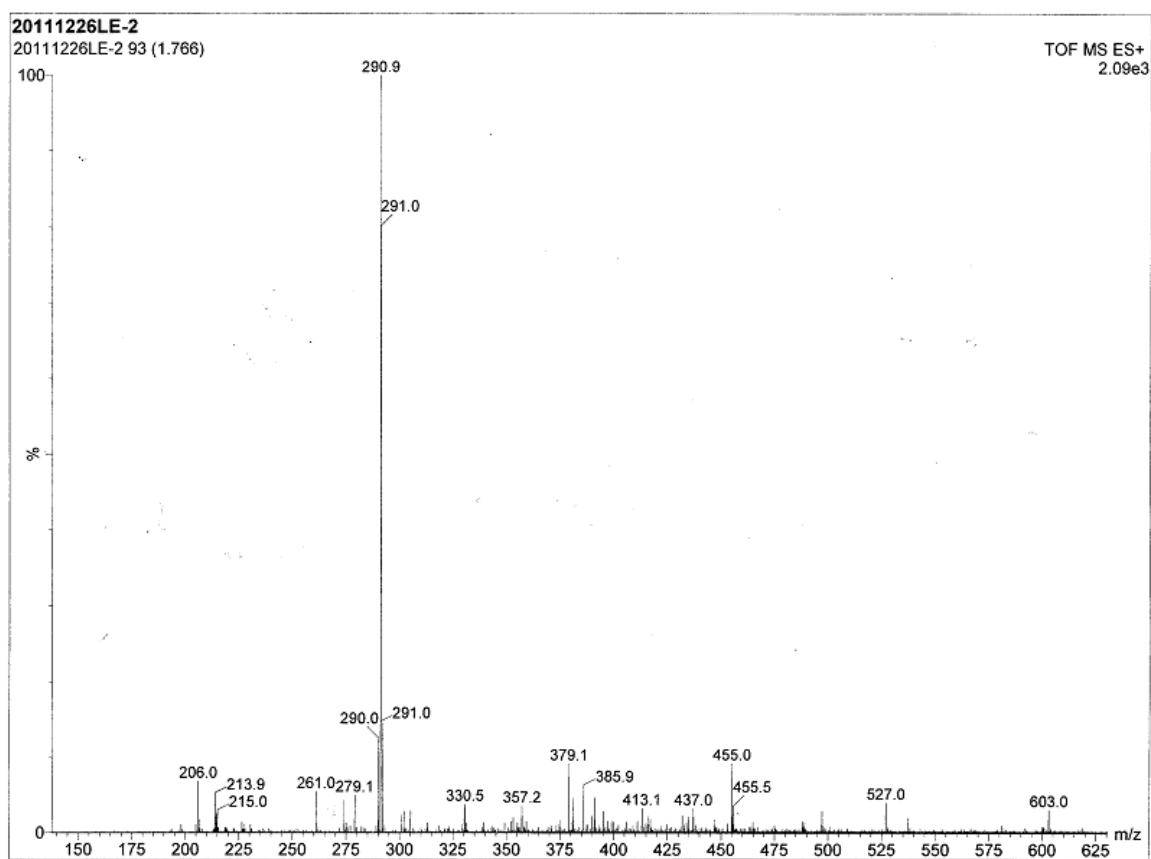

Figure S20. ESIMS spectrum of compound 3.

D:\MS-DATA\20120830-LE-2\_120830110153

8/30/2012 11:05:13 AM

LE-2

20120830-LE-2\_120830110153 #22-26 RT: 0.58-0.68 AV: 5 NL: 6.76E5  
T: FTMS + p ESI Full ms [100.00-1000.00]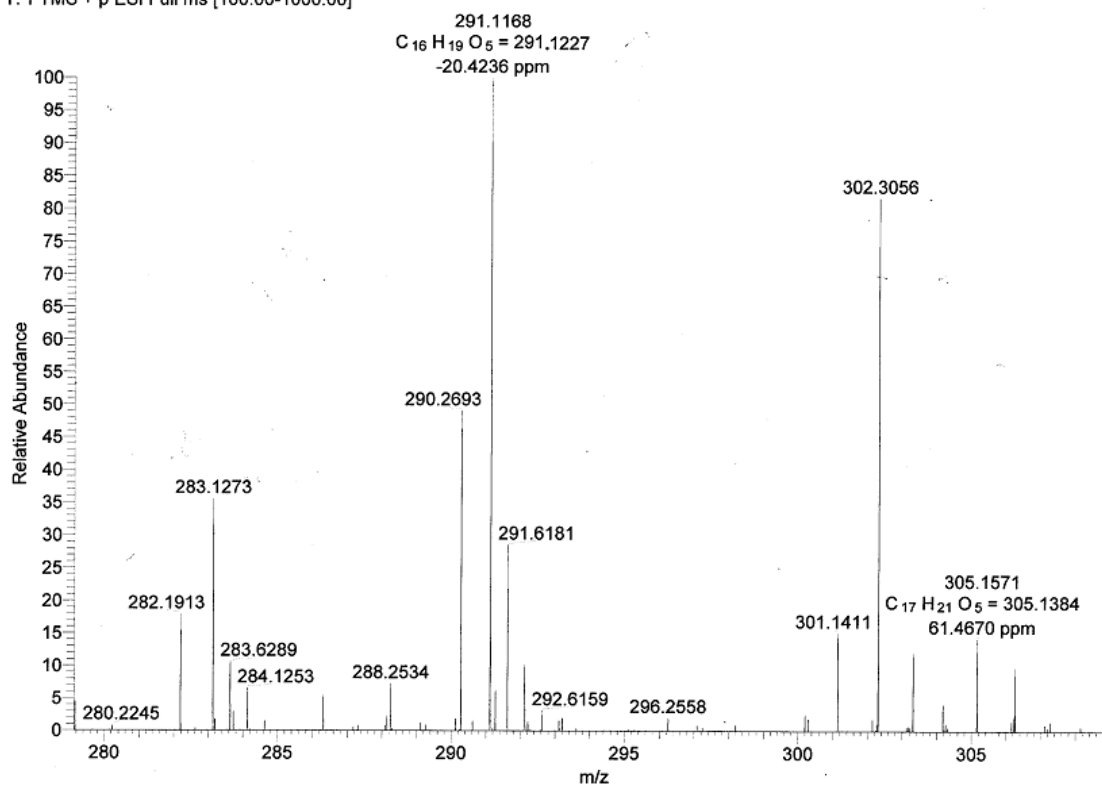

Figure S21. HRESIMS spectrum of compound 3.
